# Supplementary material for: Psoriatic Arthritis and Burden of Disease: Patient Perspectives from the Population-Based Multinational Assessment of Psoriasis and Psoriatic Arthritis (MAPP) Survey
Source: Springer Nature journal article supplement (doi:10.1007/s40744-016-0029-z), 2016-02-29
Supplement: MOESM1 [file 24439214]

## *Why carry out this study?*

- Psoriatic arthritis adds to the already substantial burden of disease in patients with psoriasis, including a significant impact on physical function and activities of daily living.
- The population-based Multinational Assessment of Psoriasis and Psoriatic Arthritis (MAPP) survey examined the impact of psoriatic arthritis on patients' activities of daily living and unmet treatment needs.

## *What was learned from the study?*

- Psoriatic arthritis is undertreated.
- Improved screening of patients with psoriasis may lead to more diagnoses and earlier treatment of psoriatic arthritis, potentially impacting the burden of disease.
- Appropriate treatment, referral to specialists, and effective communication between patients and their physicians may improve outcomes in patients with psoriatic arthritis.

This summary slide represents the opinions of the authors. The MAPP survey was sponsored by Celgene Corporation, Summit, NJ, USA. The authors received editorial support in the preparation of the manuscript from Jennifer Schwinn, RPh, Amy Zannikos, PharmD, and Peloton Advantage, LLC, funded by Celgene Corporation. For a full list of acknowledgments and disclosures for all authors of this article, please see the full text online. © The Author(s) 2016. Creative Commons Attribution Noncommercial License (CC BY-NC).
